# Supplementary material for: Competitive coordination assembly of light-degradable gold nanocluster-intercalated metal organic frameworks for photoresponsive drug release
Source: Royal Society of Chemistry journal article supplement (doi:10.1039/d3tb03012a), 2024-01-01
Supplement: d3tb03012a1.pdf [file d3tb03012a1.pdf]

## Supplementary information

### **Competitive coordination assembly of light-degradable gold nanoclusters- intercalated metal organic frameworks for photoresponsive drug release**

Ke Wang,<sup>\* a</sup> Sicheng Zhai,<sup>a</sup> Yuanyuan Qin,<sup>b</sup> Mengke Hao,<sup>b</sup> Siqi Su,<sup>b</sup> Shuming Li,<sup>\*b</sup> and Xuexue Tang<sup>a</sup>

<sup>a</sup> School of Medical Engineering, Haojing College of Shaanxi University of Science & Technology, Xianyang 712046, Shaanxi, P.R. China

<sup>b</sup> Co-construction Collaborative Innovation Center for Chinese Medicine Resources Industrialization by Shaanxi & Education Ministry, Shaanxi University of Chinese Medicine, Xianyang, 712083, Shaanxi, P.R. China

\*Corresponding author

E-mail: iamkwang@163.com; 1501034@sntcm.edu.cn

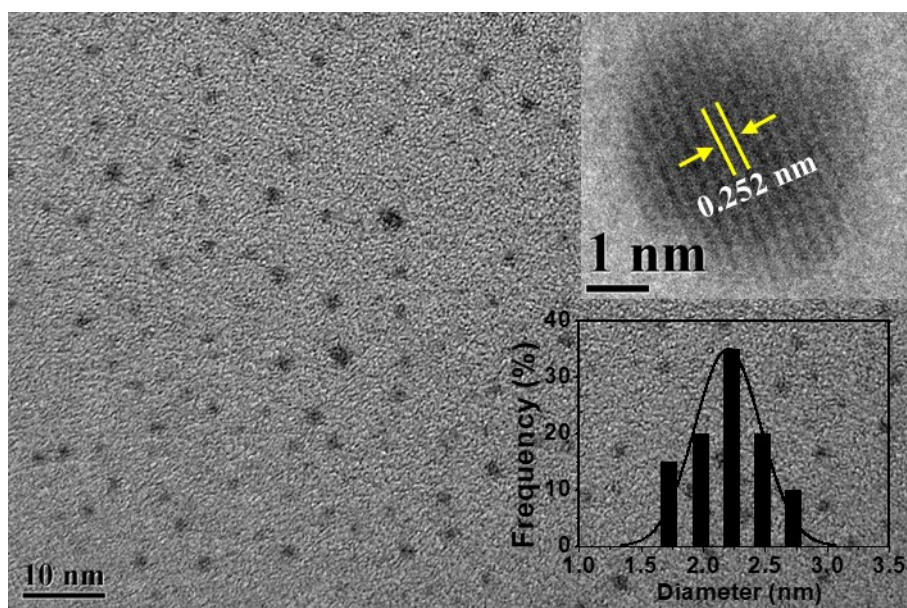

Fig. S1 TEM image of the AuNCs, inset: HRTEM image and size distribution of AuNCs.

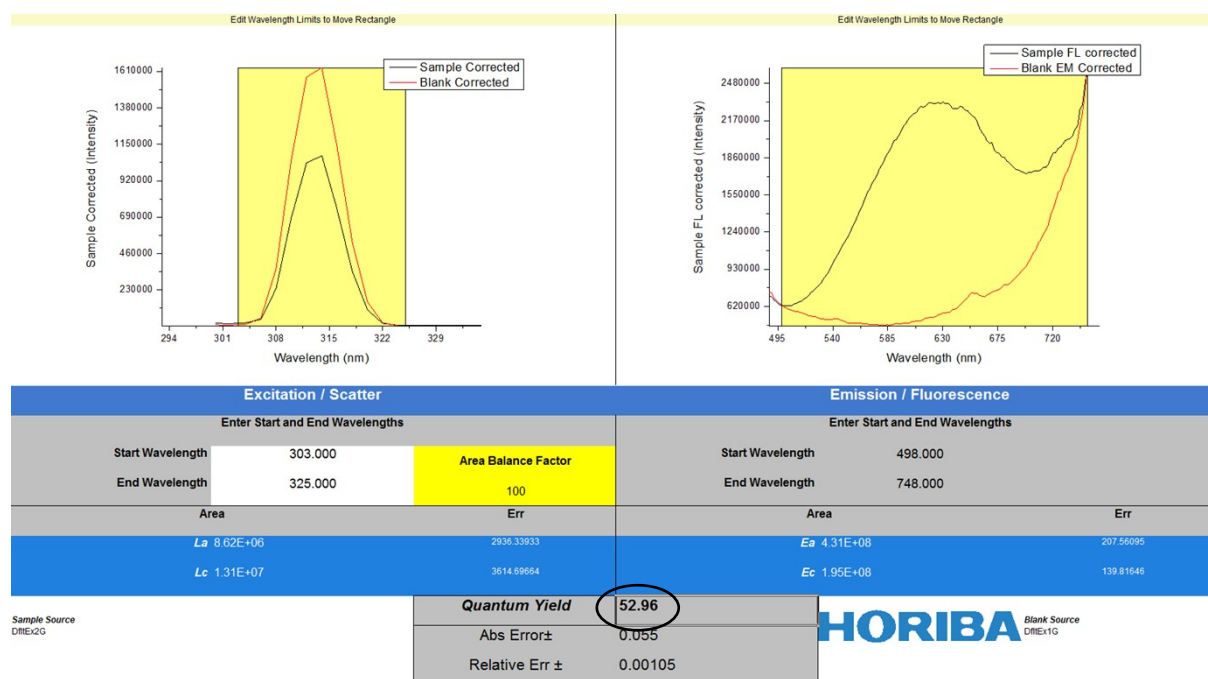

Fig. S2 The QY of AuNC@ZIF-8 in water.

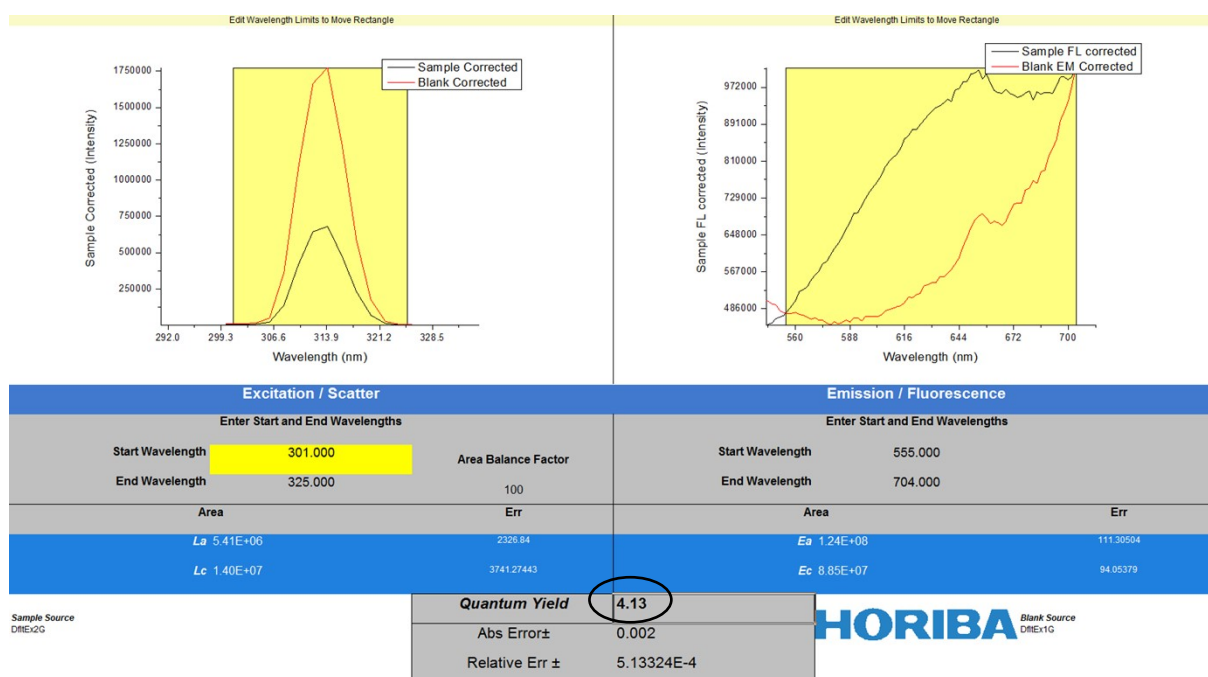

Fig. S3 The QY of AuNCs aqueous solution.

Table S1 List of reported for enhancing QY of GSH-AuNCs.

| Materials                       | Step number | Solution         | $QY_{AuNCs}$ (%) | $QY_{material}$ (%) | Ref.      |
|---------------------------------|-------------|------------------|------------------|---------------------|-----------|
| Au NCs/LDH UTFs                 | Two         | H <sub>2</sub> O | 2.69             | 14.11               | [1]       |
| Au NCs/ELDH                     | Three       | Formamide        | 2.60             | 19.05               | [2]       |
| Au(I)-Thiolate@SiO <sub>2</sub> | Two         | 85% Ethanol      | /                | /                   | [3]       |
| aAuNCs-MOF                      | Two         | Methanol         | 4.63             | 7.74                | [4]       |
| AuNCs@ZIF-8                     | Two         | Methanol         | 7.6              | 33.6                | [5]       |
| AuNCs@ZIF-8.                    | One         | H <sub>2</sub> O | 4.13             | 52.96               | This work |

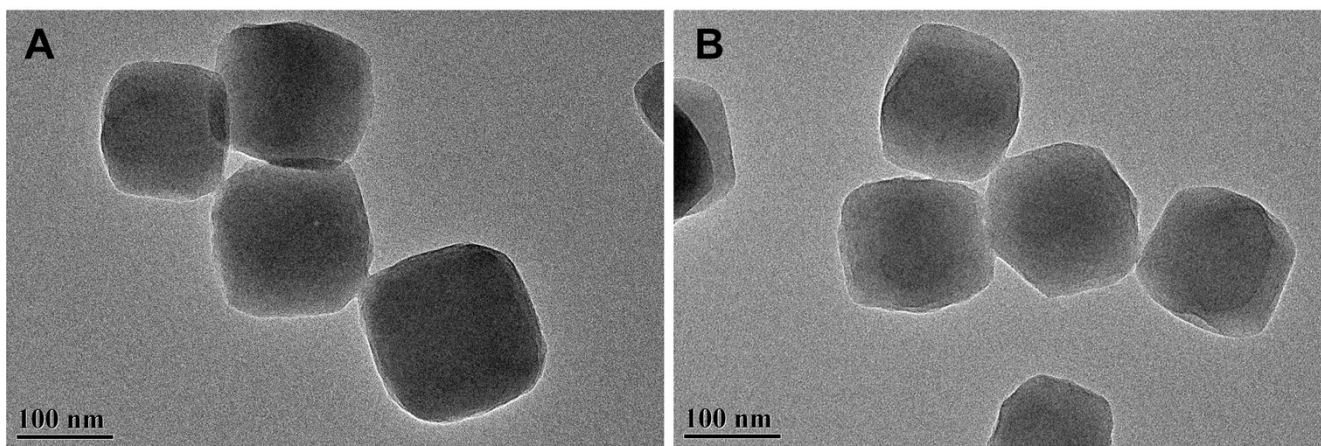

**Fig. S4** TEM images of ZIF-8 in water (A) before and (B) after light irradiation at 405 nm ( $0.1 \text{ W/cm}^2$ ) for 20 min.

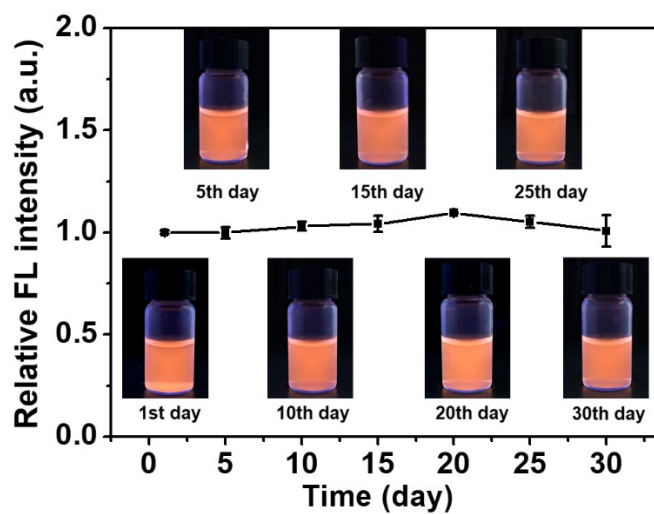

**Fig. S5** Relative fluorescence intensity and photographs of AuNC@ZIF-8 aqueous solution for different days.



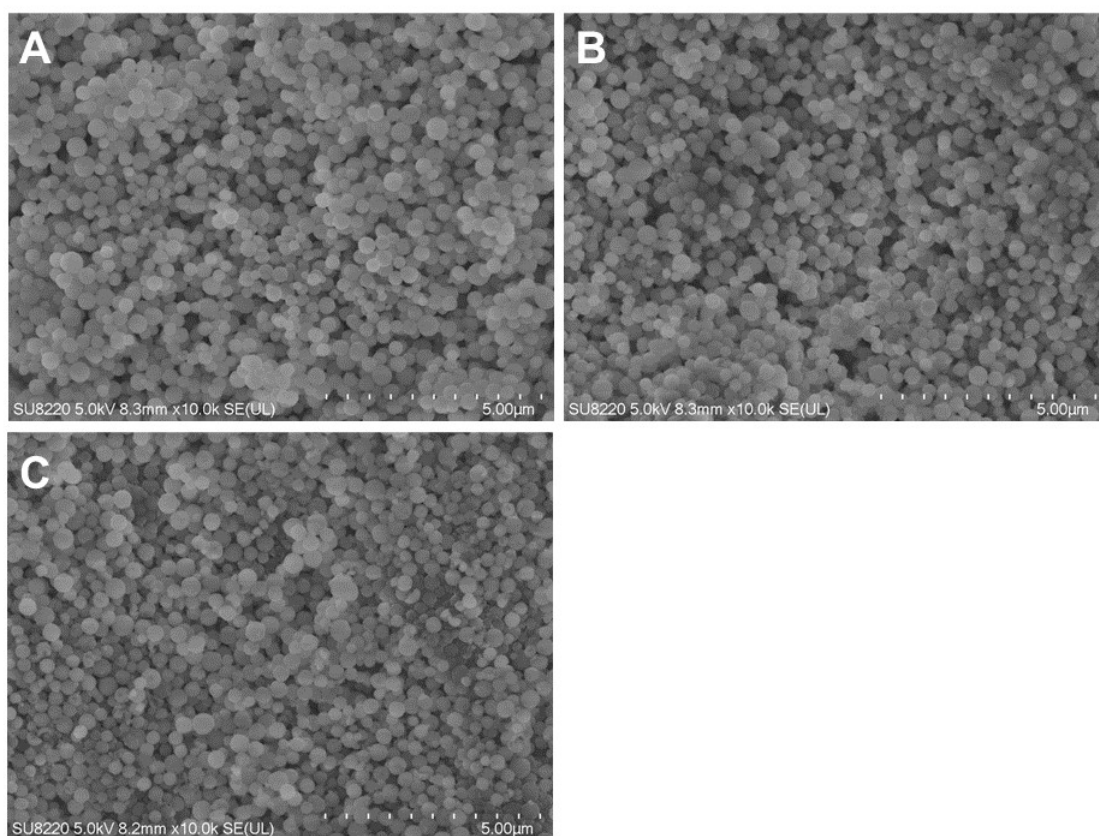

**Fig. S6** The SEM images of AuNC@ZIF-8 (A) before and after dispersion in aqueous solution (B) and cell culture medium (C) for 30 days at 4°C.

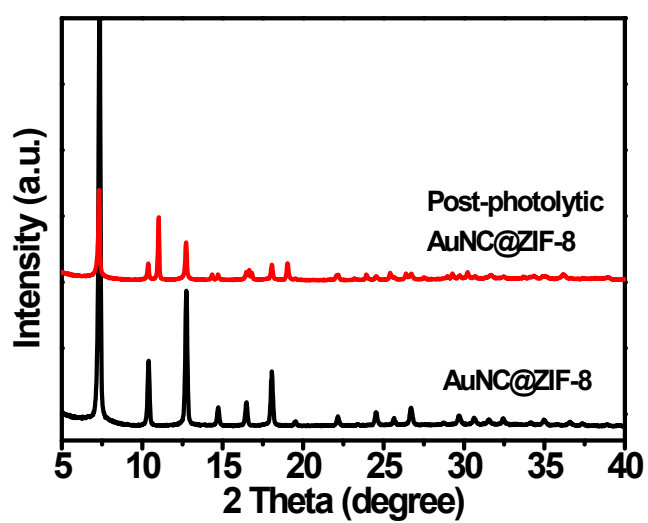

**Fig. S7** XRD patterns of AuNC@ZIF-8 and post-photolytic AuNC@ZIF-8.

**Table S2** List of XPS area percentage of Au, S, N, O.

|                            | Au     |        | S      | N                |        |            | O      |
|----------------------------|--------|--------|--------|------------------|--------|------------|--------|
|                            | Au(I)  | Au(0)  | -SH    | -NH <sub>2</sub> | N-Zn   | pyrrolic/N | O-Zn   |
| AuNCs                      | 47.89% | 52.11% | 15.65% | 39.73%           | 0      | 60.27      | 0      |
| post-photolytic AuNCs      | 31.25% | 68.75% | 43.59% | N.D.             | N.D.   | N.D        | 0      |
| AuNC@ZIF-8                 | 49.41% | 50.59% | 12.41% | 3.58%            | 51.76% | 44.65%     | 4.59%  |
| post-photolytic AuNC@ZIF-8 | 34.30% | 65.70% | 36.59% | 0                | 58.07% | 41.93%     | 15.25% |

N.D.: no detection.

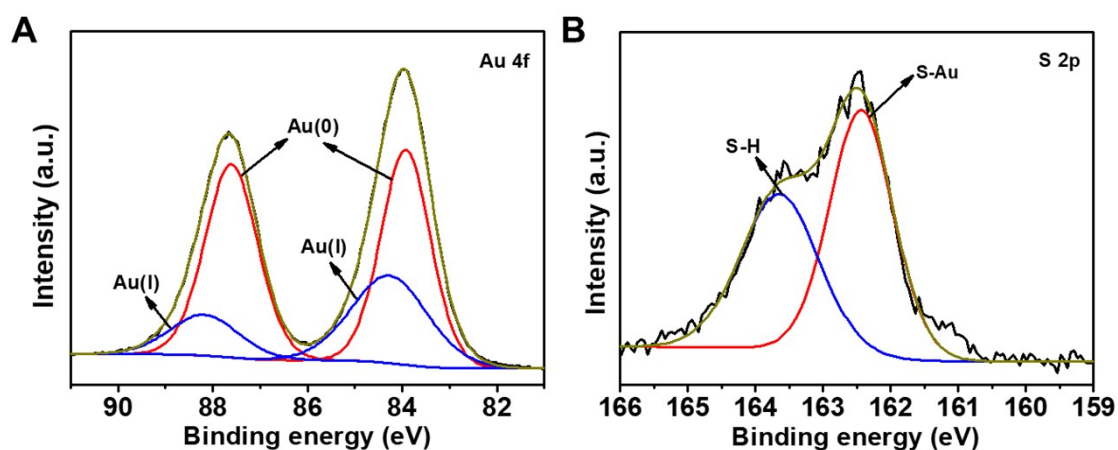**Fig. S8** High-resolution XPS Au 4f (A) and S 2p (B) spectra of the AuNCs aqueous solution after irradiation for 20 min.

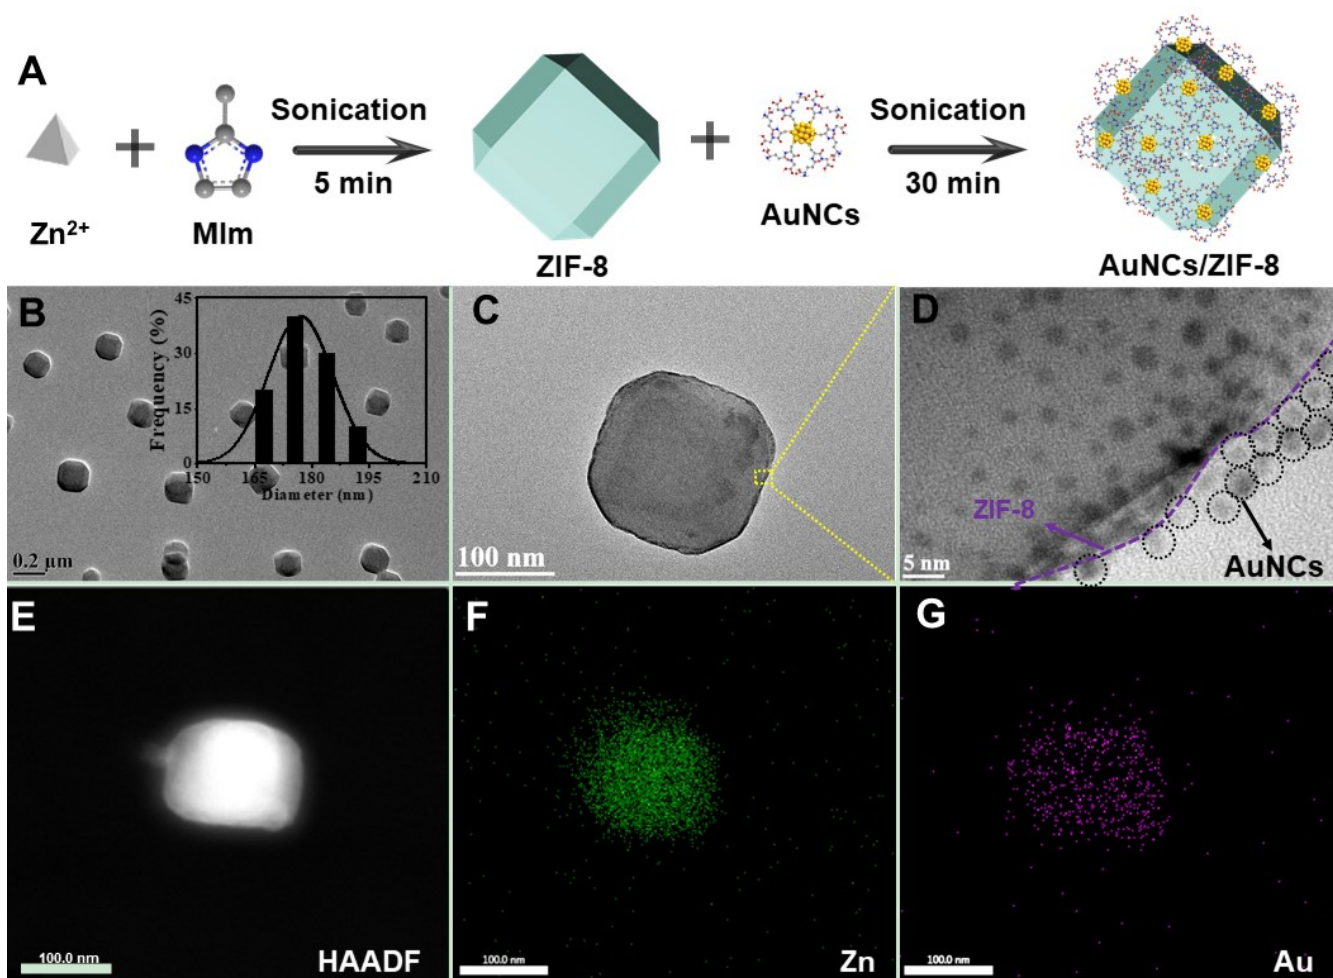

**Fig. S9** (A) Schematic illustration of two step synthesis of AuNC/ZIF-8. (B) TEM image of the ZIF-8, inset: size distribution of ZIF-8. (C) TEM image of AuNC/ZIF-8, (D) HRTEM image of the interested district of AuNC/ZIF-8, (E-G) HAADF-STEM images and corresponding elemental mappings of AuNC/ZIF-8.

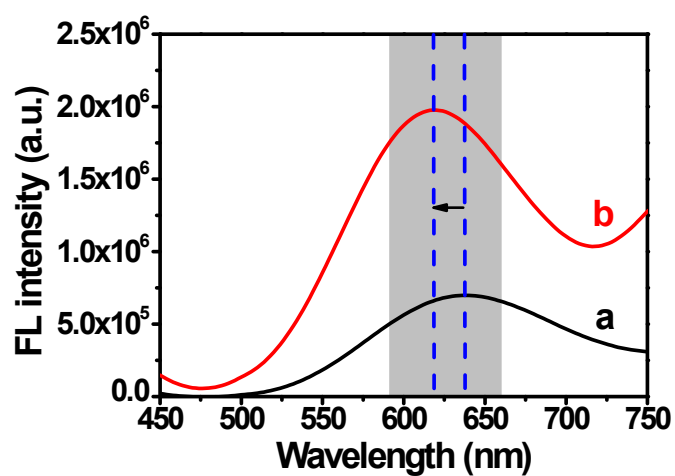

**Fig. S10** The fluorescence spectra of the AuNCs (a) and AuNC/ZIF-8 (b).

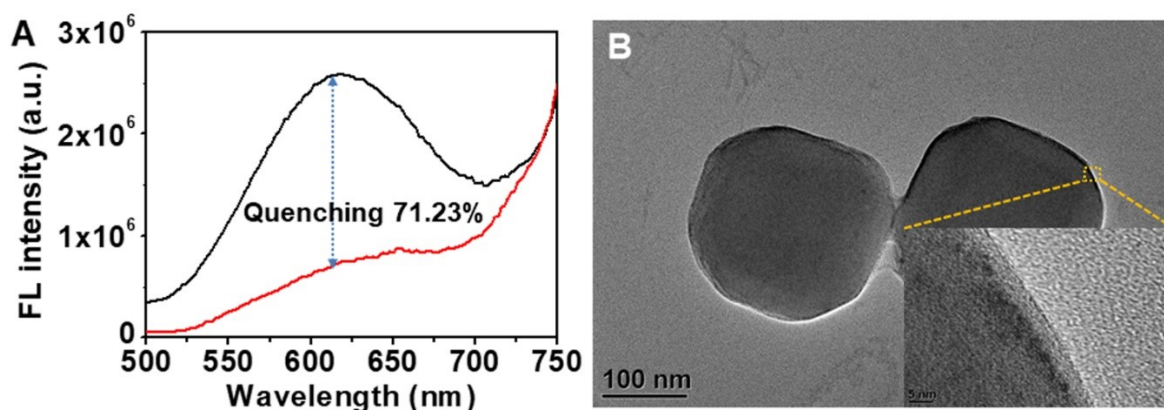

**Fig. S11** (A) Fluorescence spectra of the AuNCs/ZIF-8 before (black) and after (red) after irradiation (405 nm) in aqueous solution for 20 min. (B) TEM image of AuNCs/ZIF-8 after light irradiation (405 nm) in aqueous solution for 20 min. inset: HRTEM image of the interest district in B.

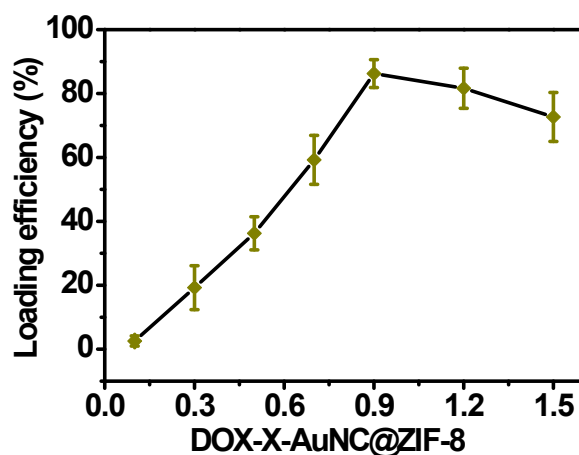

**Fig. S12** The loading efficiency of DOX in X-AuNC@ZIF-8.

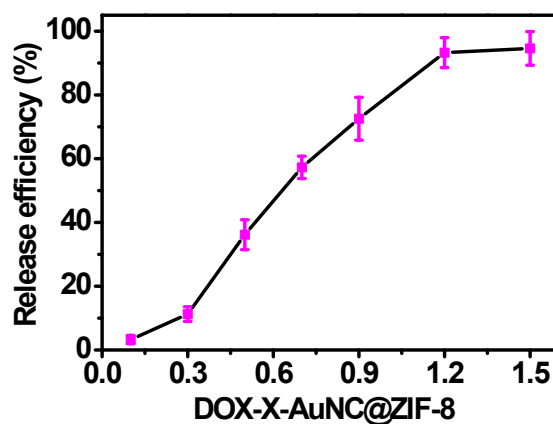

**Fig. S13** The release efficiency of DOX-X-AuNC@ZIF-8.



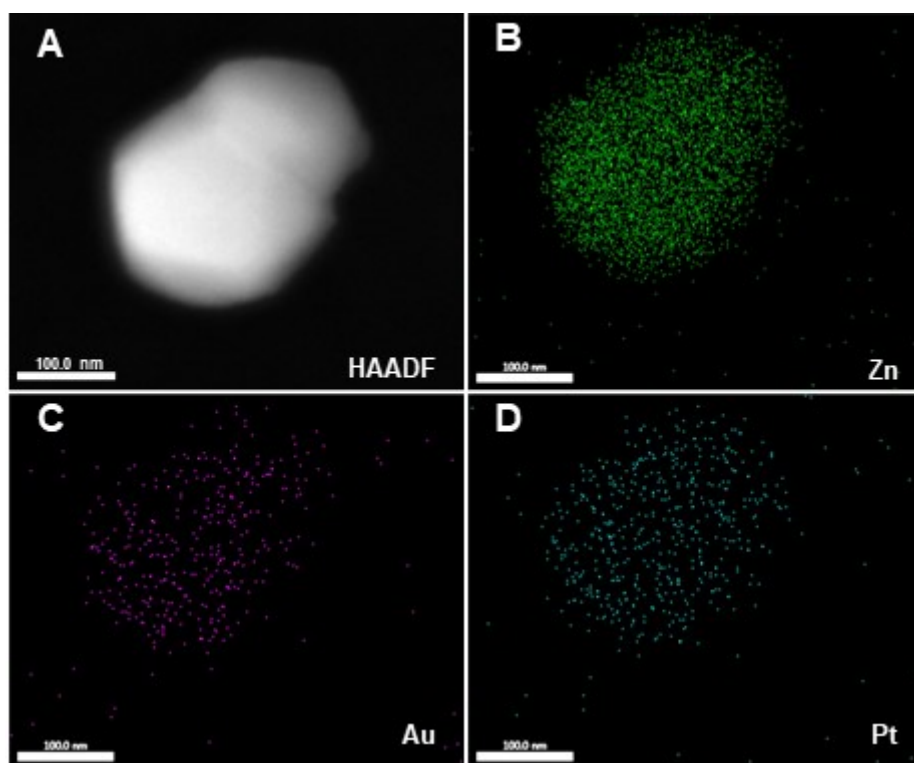

**Fig. S14** HAADF-STEM image (A) and elemental mapping of cisplatin-AuNC@ZIF-8 (B-D).

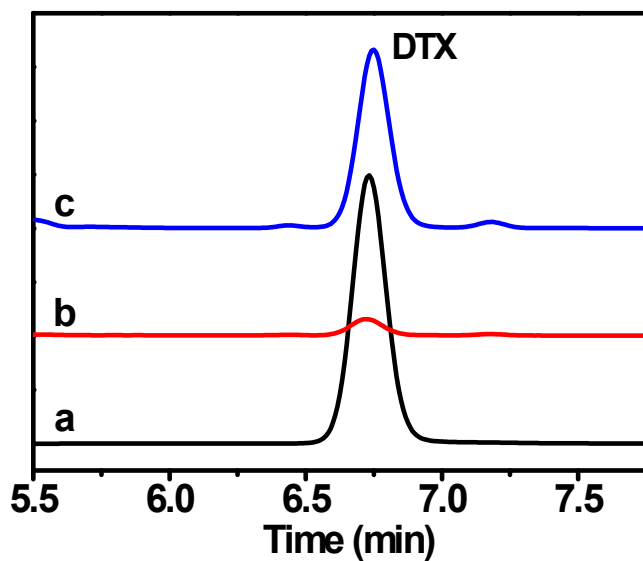

**Fig. S15** The HPLC analyses of DTX (UV detection at 243 nm). DTX (a) and the supernatant of DTX-AuNC@ZIF-8 in response to light irradiation (405 nm, 1 W/cm<sup>2</sup>) within 0 min (b) and 20 min (c).

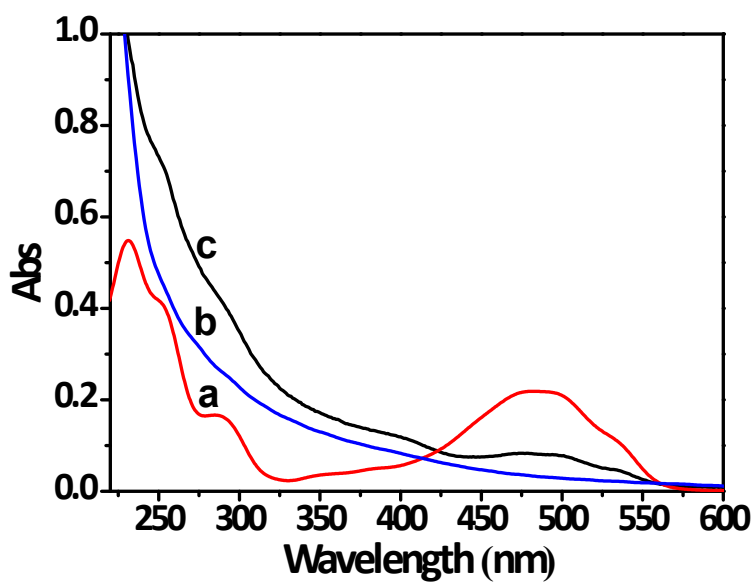

**Fig. S16 (A)** UV-vis absorption spectra of DOX (a), AuNC@ZIF-8 (b), and DOX-AuNC@ZIF-8 (c).

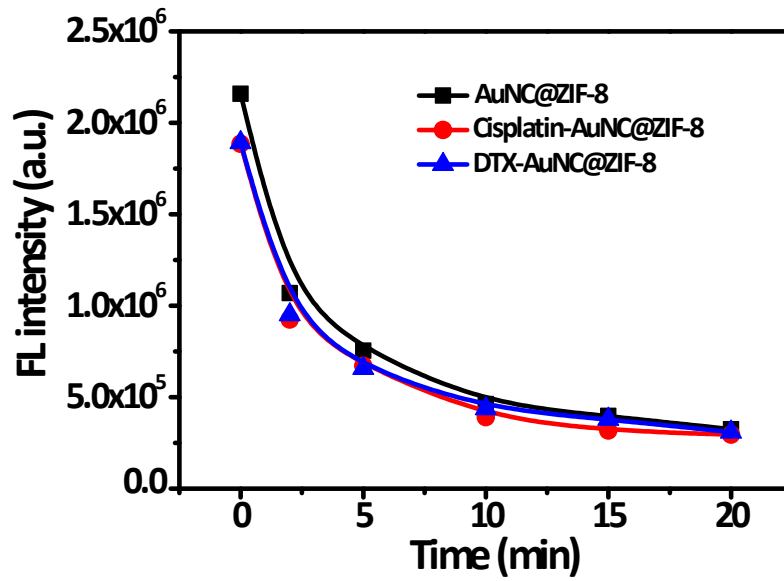

**Fig. S17** The fluorescence intensity vs irradiation time profiles of AuNC@ZIF-8 and drug-AuNC@ZIF-8.

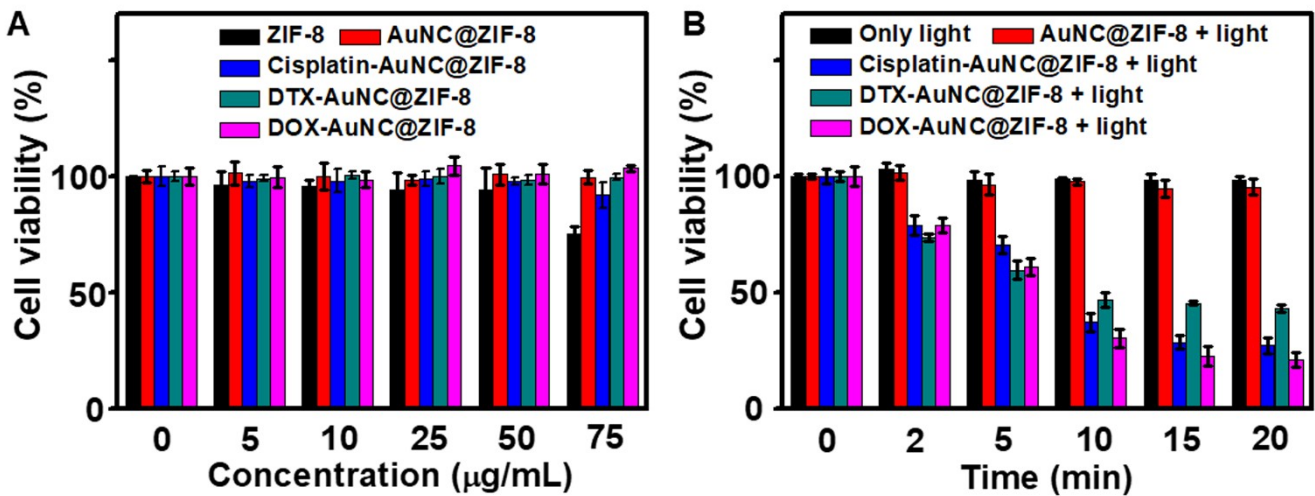

**Fig. S18** (A) Cell viability of HeLa cells incubated with different concentrations of ZIF-8, AuNC@ZIF-8 and drug-AuNC@ZIF-8 for 24 h. (B) Cell viability of HeLa cells incubated with 50 μg/mL AuNC@ZIF-8 or 50 μg/mL drug-AuNC@ZIF-8 under different irradiation time.

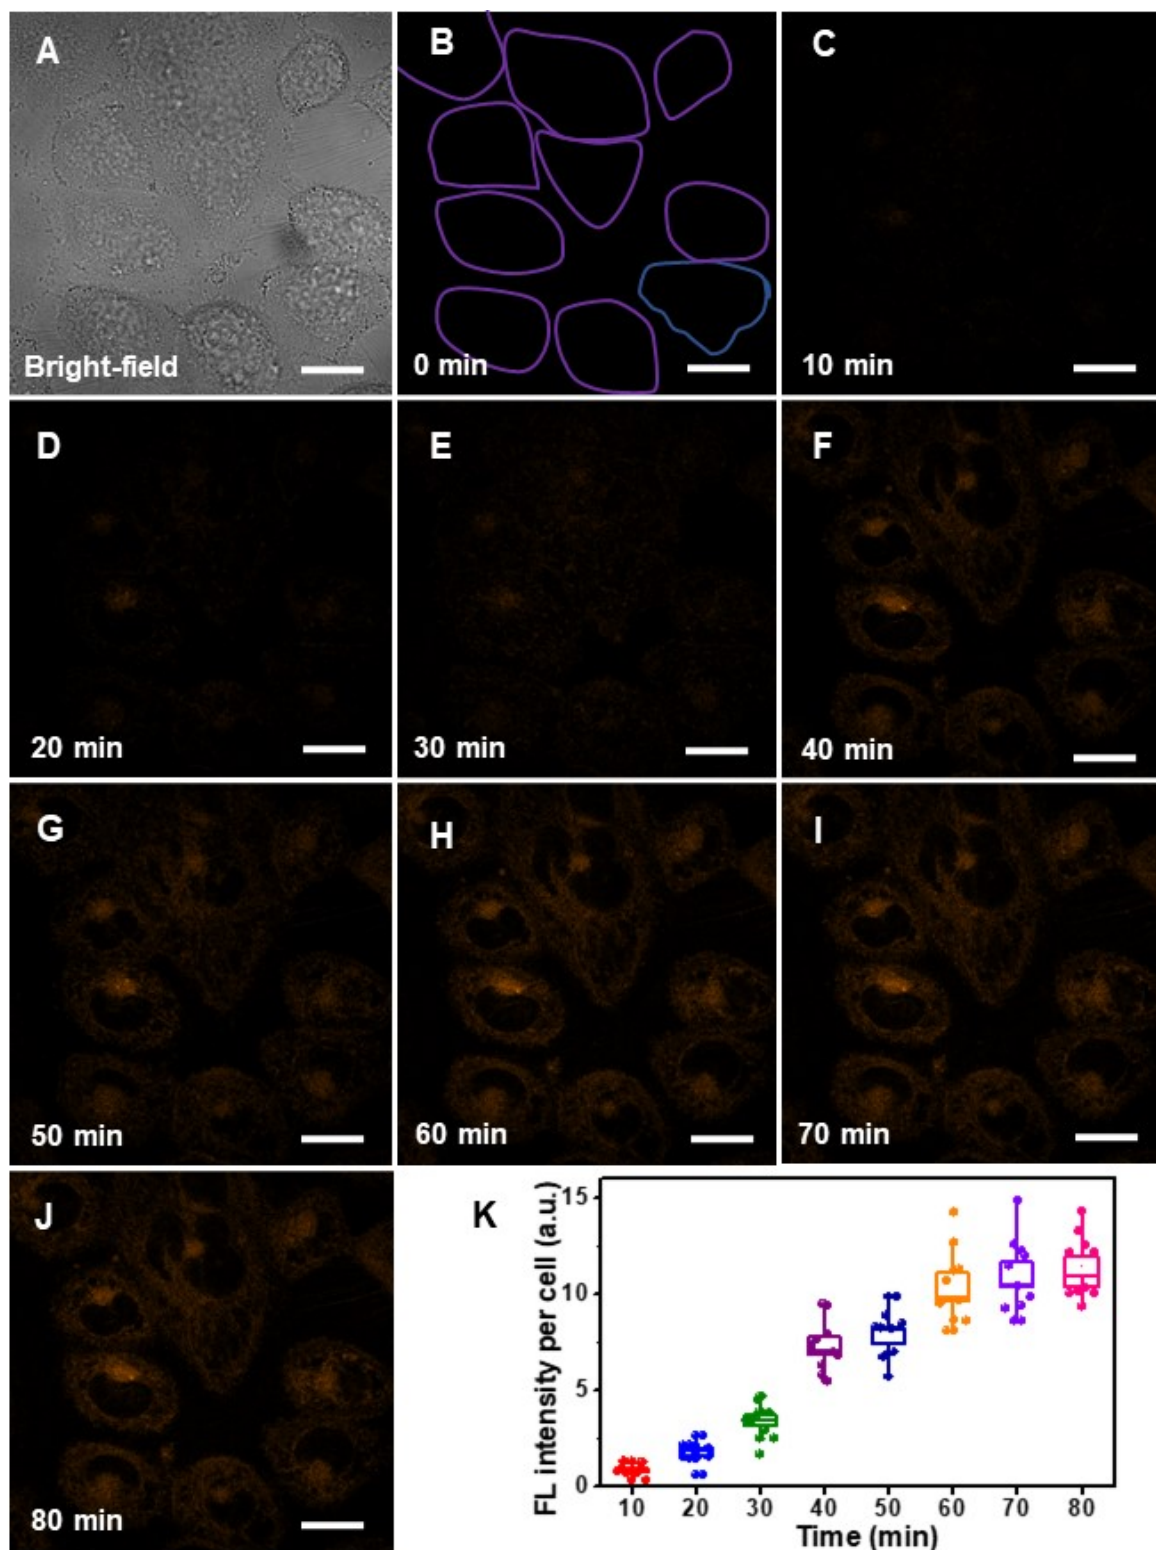

**Fig. S19** Bright field image (A) and CLSM image (B) of HeLa cells in the absence of cisplatin-AuNCs@ZIF-8. (C-J) CLSM images of HeLa cells incubated with cisplatin-AuNCs@ZIF-8 for 10 to 80 min. Scale bar: 20  $\mu$ m. (K) The corresponding intracellular fluorescence intensity of HeLa cells in images C-J. The box plot shows data points, in which each point corresponds to the fluorescence intensity of per cell obtained with ImageJ software.

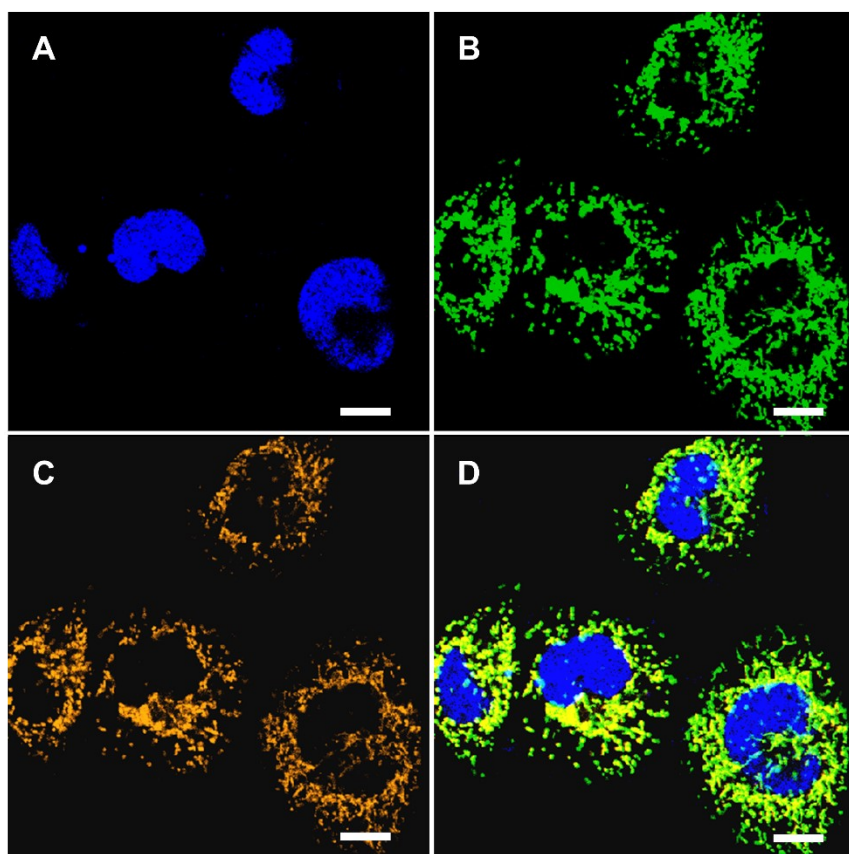

**Fig. S20** CLSM images of HeLa cells co-incubated with AuNC@ZIF-8 and Hoechst 33342 or Rhodamine 123 for 1 h. Image of Hoechst 33342 obtained with band path of 420-450 nm upon excitation at 405 nm (blue) (A), image of Rhodamine 123 obtained with band path of 500-540 nm upon excitation at 488 nm (green) (B), image of AuNC@ZIF-8 obtained with band path of 560-650 nm upon excitation at 488 nm (orange) (C), and merged image (D). Scale bars: 10  $\mu$ m.



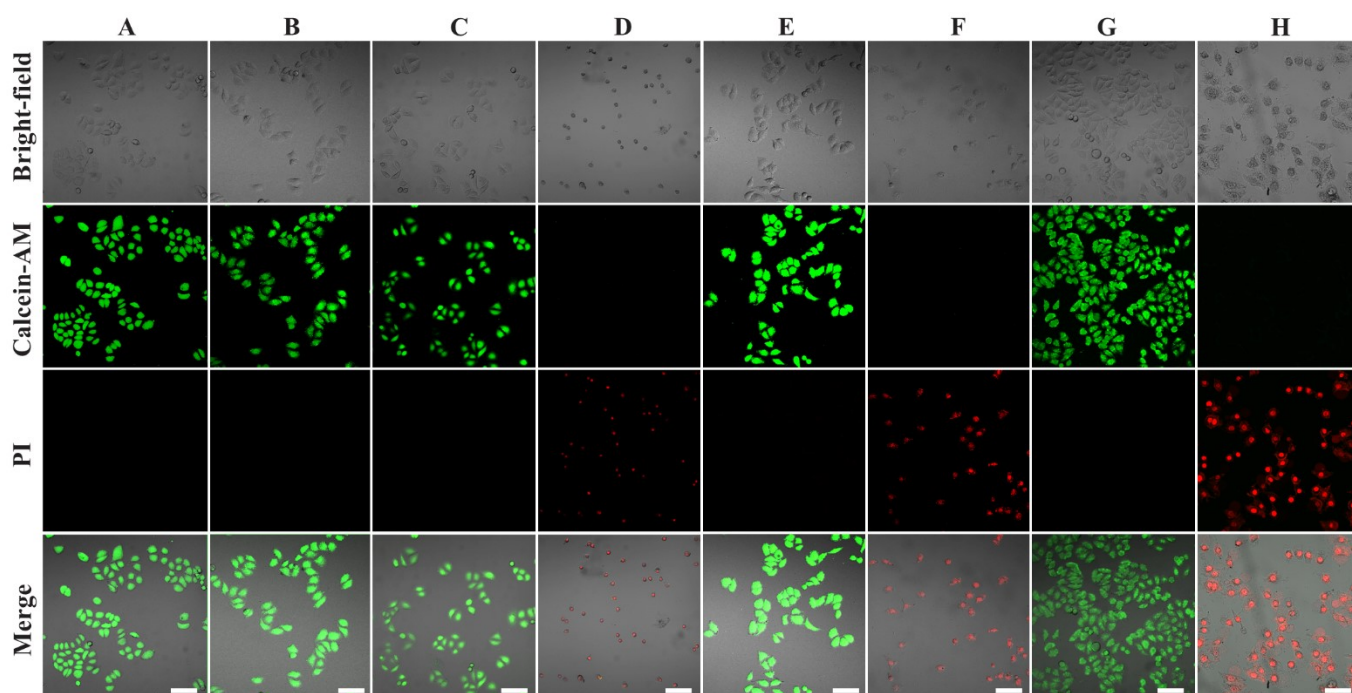

**Fig. S21** CLSM images of HeLa cells after different treatments: (A) HeLa cells incubated with PBS only; (B) HeLa cells treated with light irradiation only; HeLa cells incubated with cisplatin-AuNC@ZIF-8 (50  $\mu\text{g}/\text{mL}$ ) and then treated without (C) and with (D) light irradiation for 5 min; HeLa cells incubated with DTX-AuNC@ZIF-8 (50  $\mu\text{g}/\text{mL}$ ) and then treated without (E) or with (F) light irradiation for 5 min; HeLa cells incubated with DOX-AuNC@ZIF-8 (50  $\mu\text{g}/\text{mL}$ ) and then treated without (G) or with (H) light irradiation for 5 min. The cells are all co-contained by Calcein-AM (green, live cells) and PI (red, dead cells). Scale bar: 50  $\mu\text{m}$ .

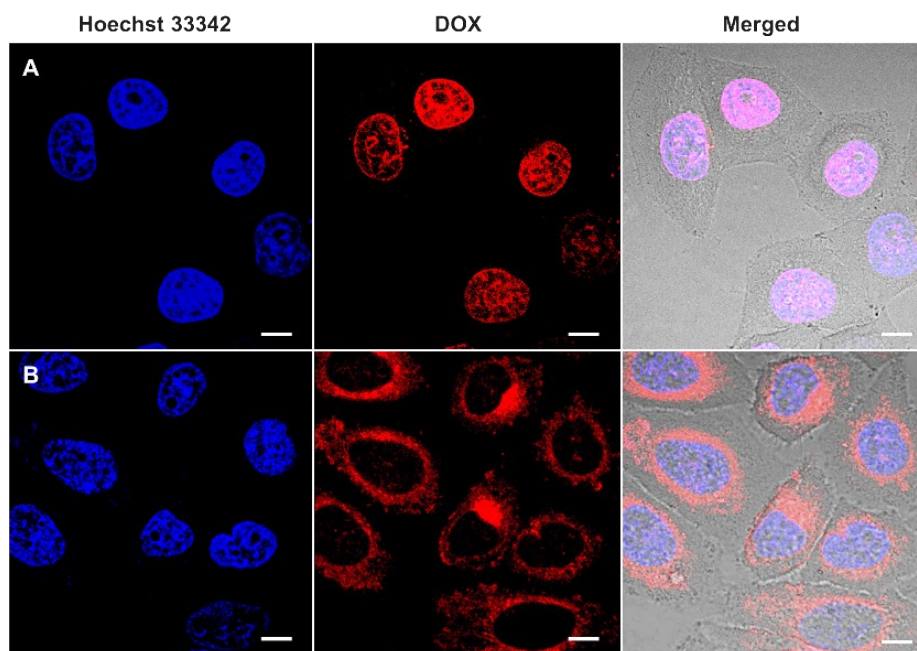

**Fig. S22** CLSM images of HeLa cells incubated with free DOX (A) and DOX-AuNC@ZIF-8 (B). Scale bar: 20  $\mu$ m.

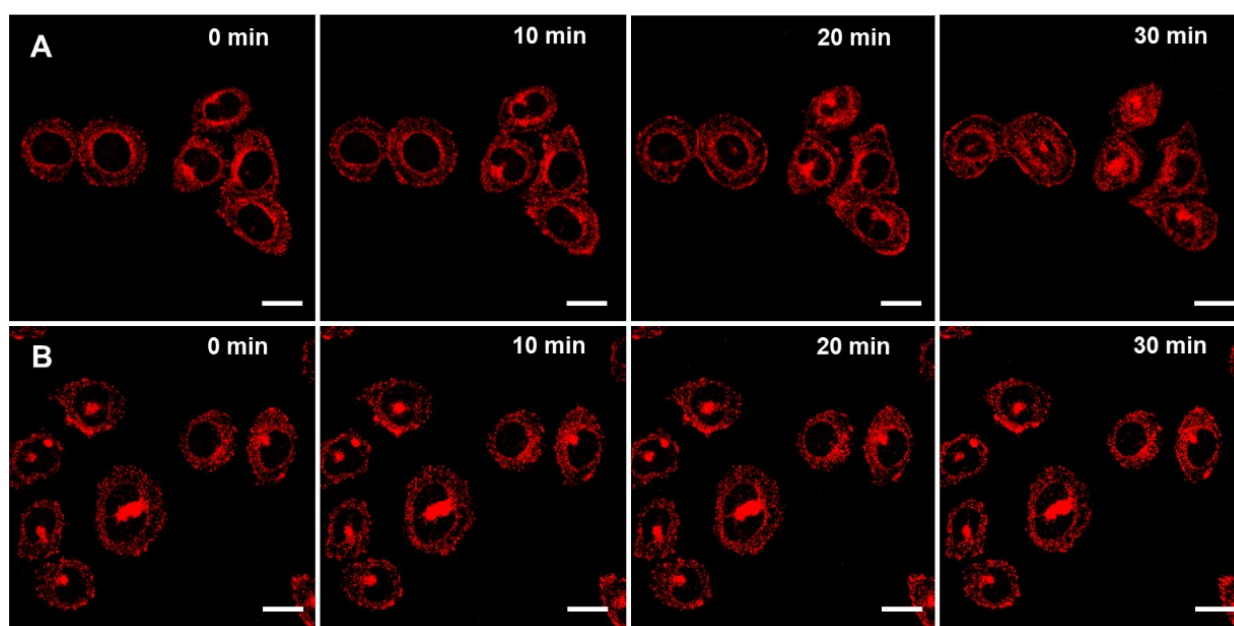

**Fig. S23** CLSM images of HeLa cells incubated with DOX-AuNC@ZIF-8 with (A) or without (B) light irradiation for 5 min. Scale bar: 20  $\mu$ m.

## References

- [1] R. Tian, S. Zhang, M. Li, Y. Zhou, B. Lu, D. Yan, M. Wei, D. G. Evans, X. Duan, Localization of Au nanoclusters on layered double hydroxides nanosheets: confinement-induced emission enhancement and temperature-responsive luminescence, *Adv. Funct. Mater.* 25 (2015) 5006–5015, <https://doi.org/10.1002/adfm.201501433>.
- [2] R. Tian, D. Yan, C. Li, S. Xu, R. Liang, L. Guo, M. Wei, D. G. Evans, X. Duan, Surface-confined fluorescence enhancement of Au nanoclusters anchoring to a two-dimensional ultrathin nanosheet toward bioimaging, *Nanoscale* 8 (2016) 9815–9821, <https://doi.org/10.1039/C6NR01624C>.
- [3] T. Zhao, N. Goswami, J. Li, Q. Yao, Y. Zhang, J. Wang, D. Zhao, J. Xie, Probing the microporous structure of silica shell via aggregation-induced emission in Au(I)-thiolate@SiO<sub>2</sub> nanoparticle, *Small* 12 (2016) 6537–6541, <https://doi.org/10.1002/sml.201601420>.
- [4] F. Cao, E. Ju, C. Liu, W. Li, Y. Zhang, K. Dong, Z. Liu, J. Ren, X. Qu, Encapsulation of aggregated gold nanoclusters in a metal–organic framework for real-time monitoring of drug release, *Nanoscale* 9 (2017) 4128–4134, <https://doi.org/10.1039/C7NR00073A>.
- [5] Q. Gao, S. Xu, C. Guo, Y. Chen, L. Wang, Embedding nanocluster in MOF via crystalline ion-triggered growth strategy for improved emission and selective sensing, *ACS Appl. Mater. Interfaces* 10 (2018) 16059–16065, <https://doi.org/10.1021/acsami.8b04531>.
